# Supplementary material for: Epidermal p65/NF-κB signalling is essential for skin carcinogenesis
Source: PubMed Central journal article supplement (PMC4119358; doi:10.15252/emmm.201303541), 2014-06-21
Supplement: emmm0006-0970-SD3.pdf [file emmm0006-0970-SD3.pdf]

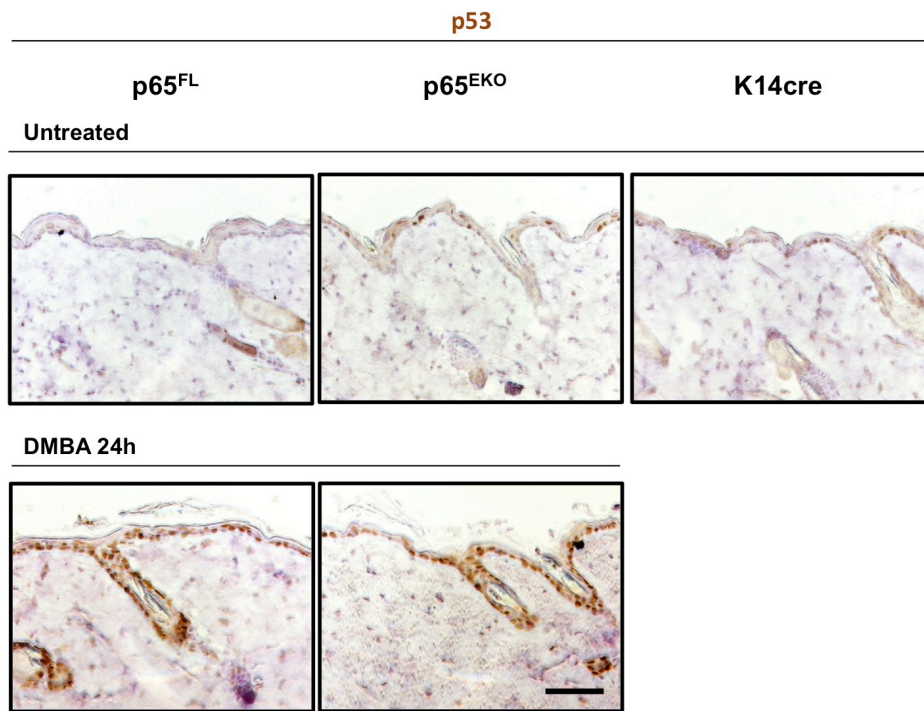

**Figure S3. p65 deficiency does not alter p53 expression in keratinocytes after DNA damage.**

Immunohistochemical analysis of p53 expression in skin sections from p65<sup>FL</sup>, p65<sup>EKO</sup>, and K14-Cre mice that were untreated or 24h after application of 100 nmol of DMBA. The experiment was performed with 3-4 mice per group. Scale bar: 50  $\mu$ m.
