# Supplementary material for: Epidermal p65/NF-κB signalling is essential for skin carcinogenesis
Source: PubMed Central journal article supplement (PMC4119358; doi:10.15252/emmm.201303541), 2014-06-21

Figure 1A

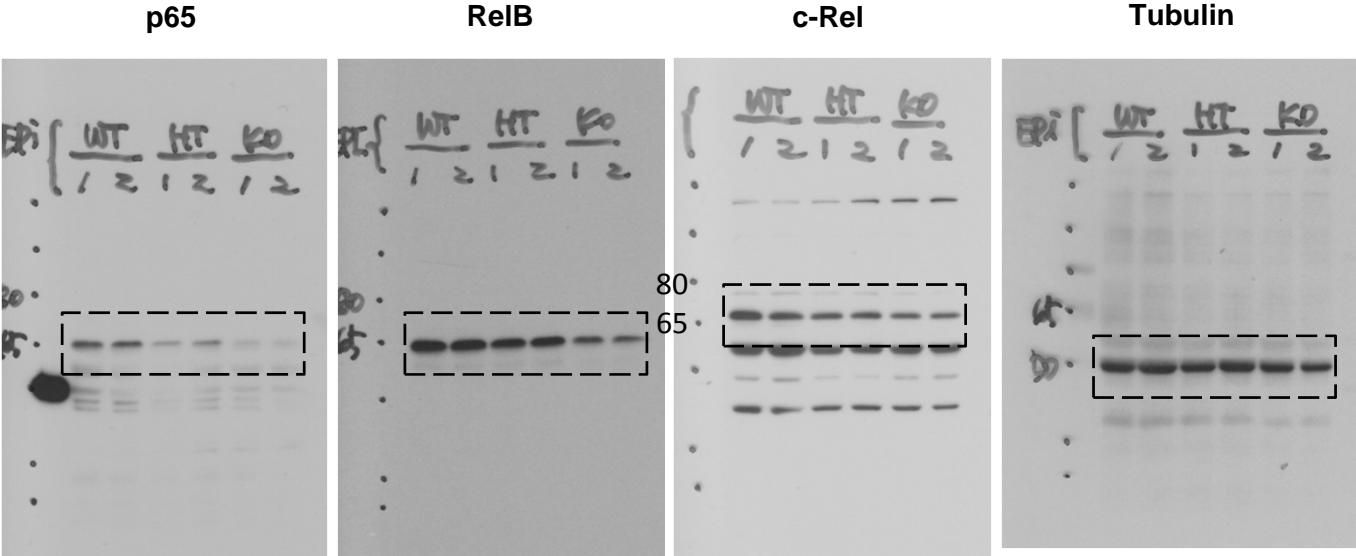

Supplement: emmm0006-0970-SD6.pdf [file emmm0006-0970-SD6.pdf]
